# Supplementary material
Source: PubMed Central journal article supplement (PMC8776033)
Supplement: NIHMS1646145-supplement-2.pdf [file NIHMS1646145-supplement-2.pdf]

ED Fig. 1a uncropped and unprocessed blot scan with molecular weight markers.

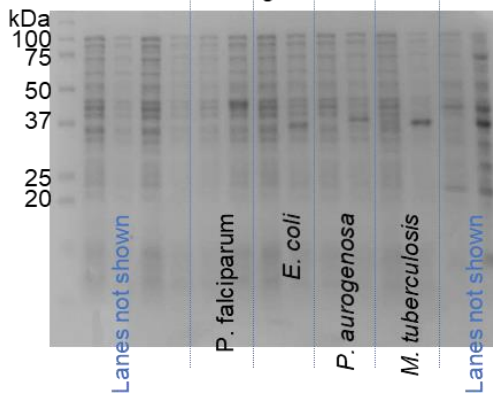

ED Fig. 1b uncropped and unprocessed blot scan with molecular weight markers.

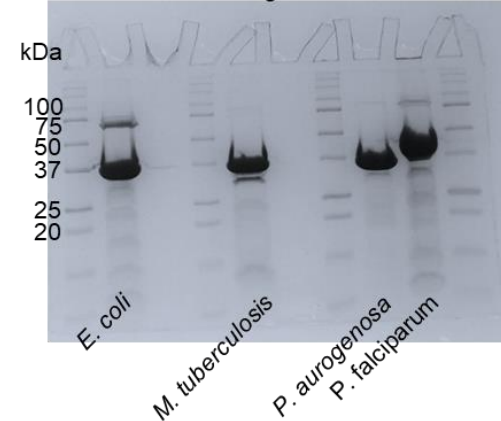

ED Fig. 5a uncropped and unprocessed blot scan with molecular weight markers.

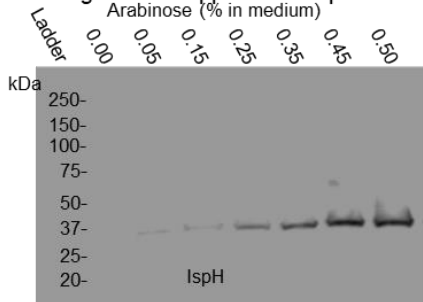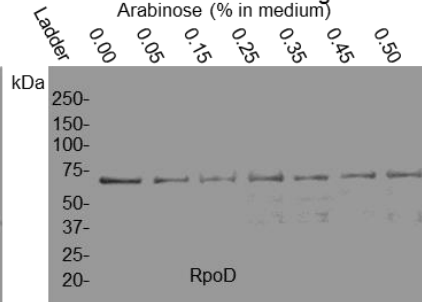

ED Fig. 8a uncropped and unprocessed blot scan with molecular weight markers.

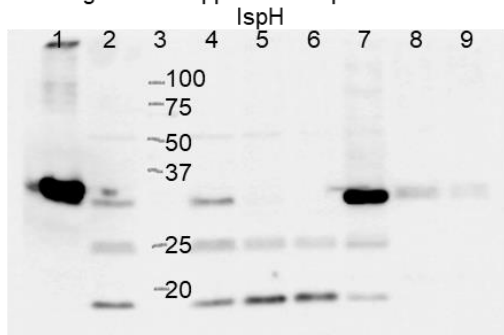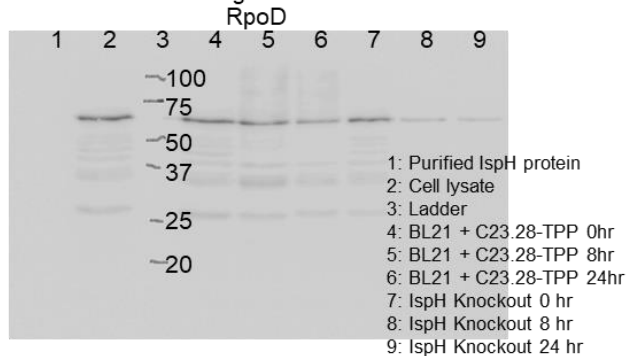

ED Fig. 8b uncropped and unprocessed blot scan with molecular weight markers.

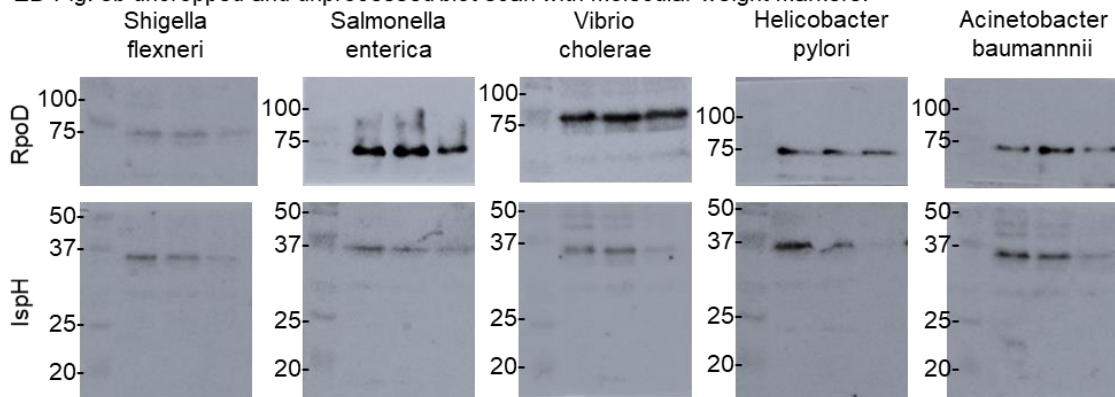

**Supplementary Figure 1: Uncropped gel and blot images with molecular weight markers.**

## a Top 24 IspH inhibitors from molecular docking

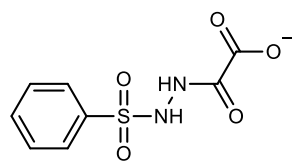

C1

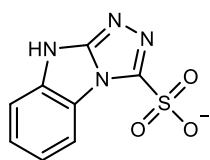

C2

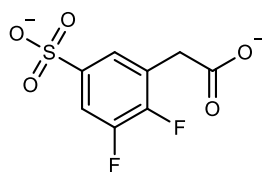

C3

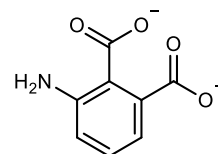

C4

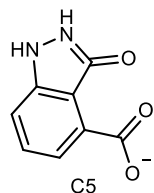

C5

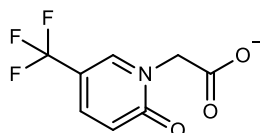

C6

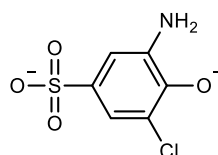

C7

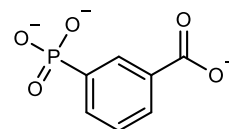

C8

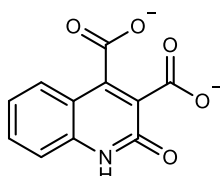

C9

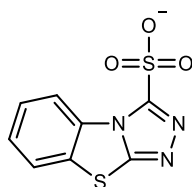

C10

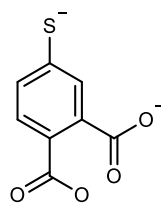

C11

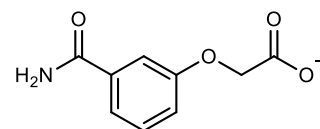

C12

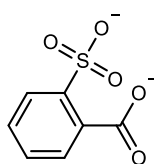

C13

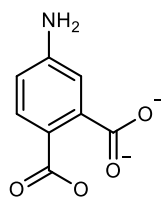

C14

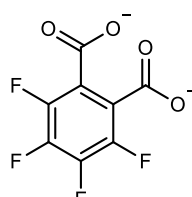

C15

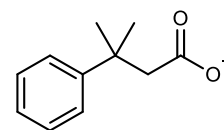

C16

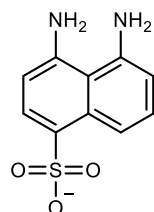

C17

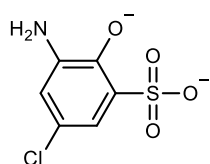

C18

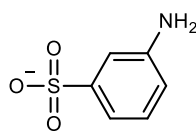

C19

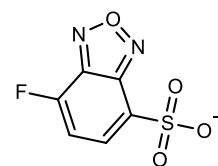

C20

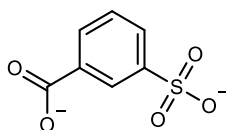

C21

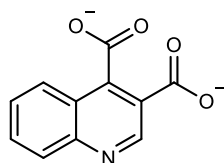

C22

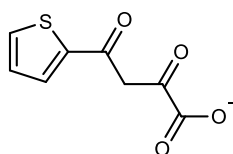

C23

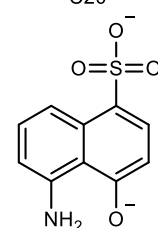

C24

**b** C23 analogs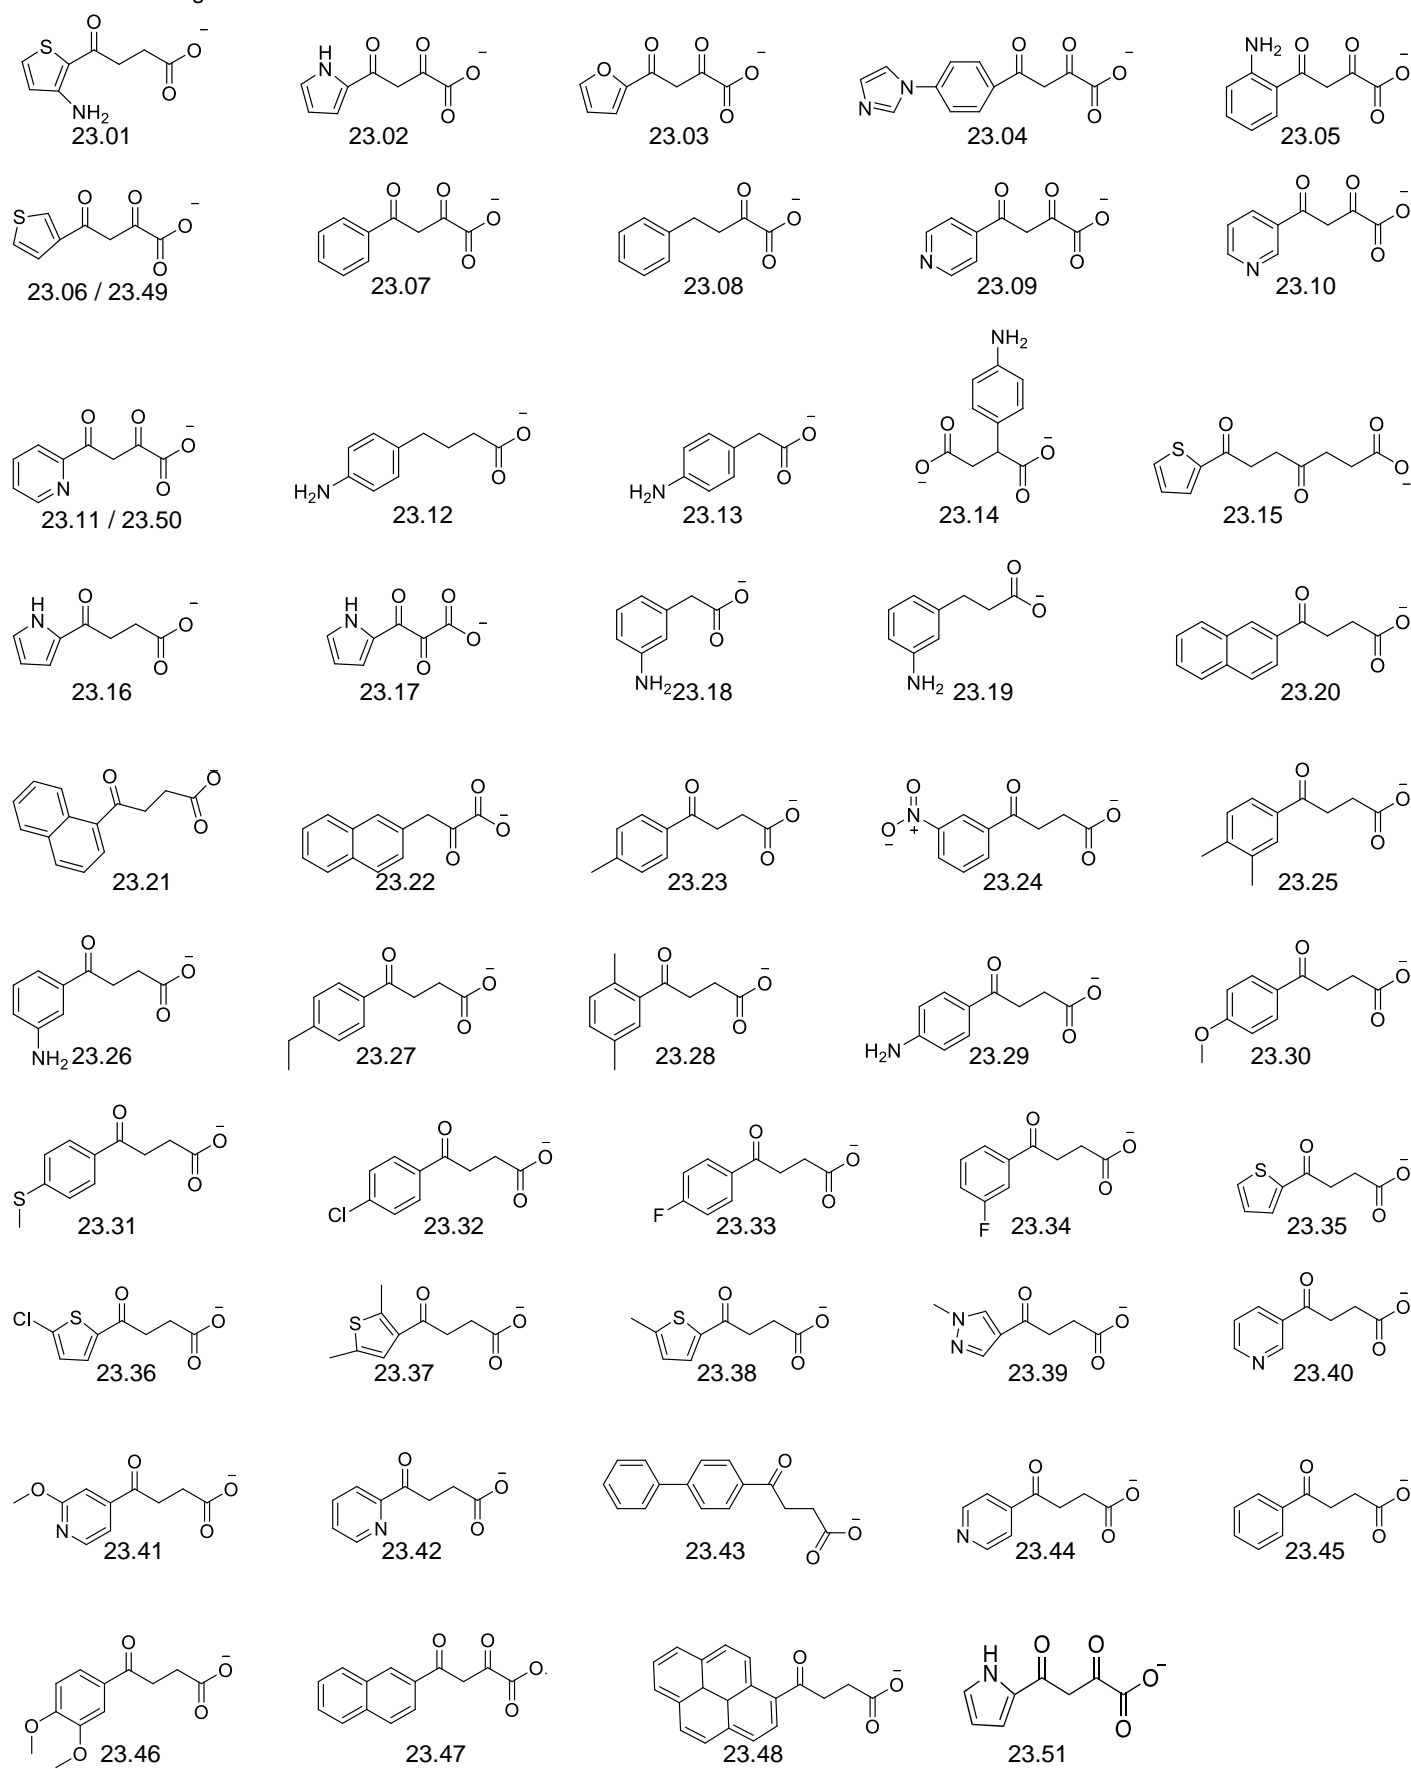

**c** C17 analogs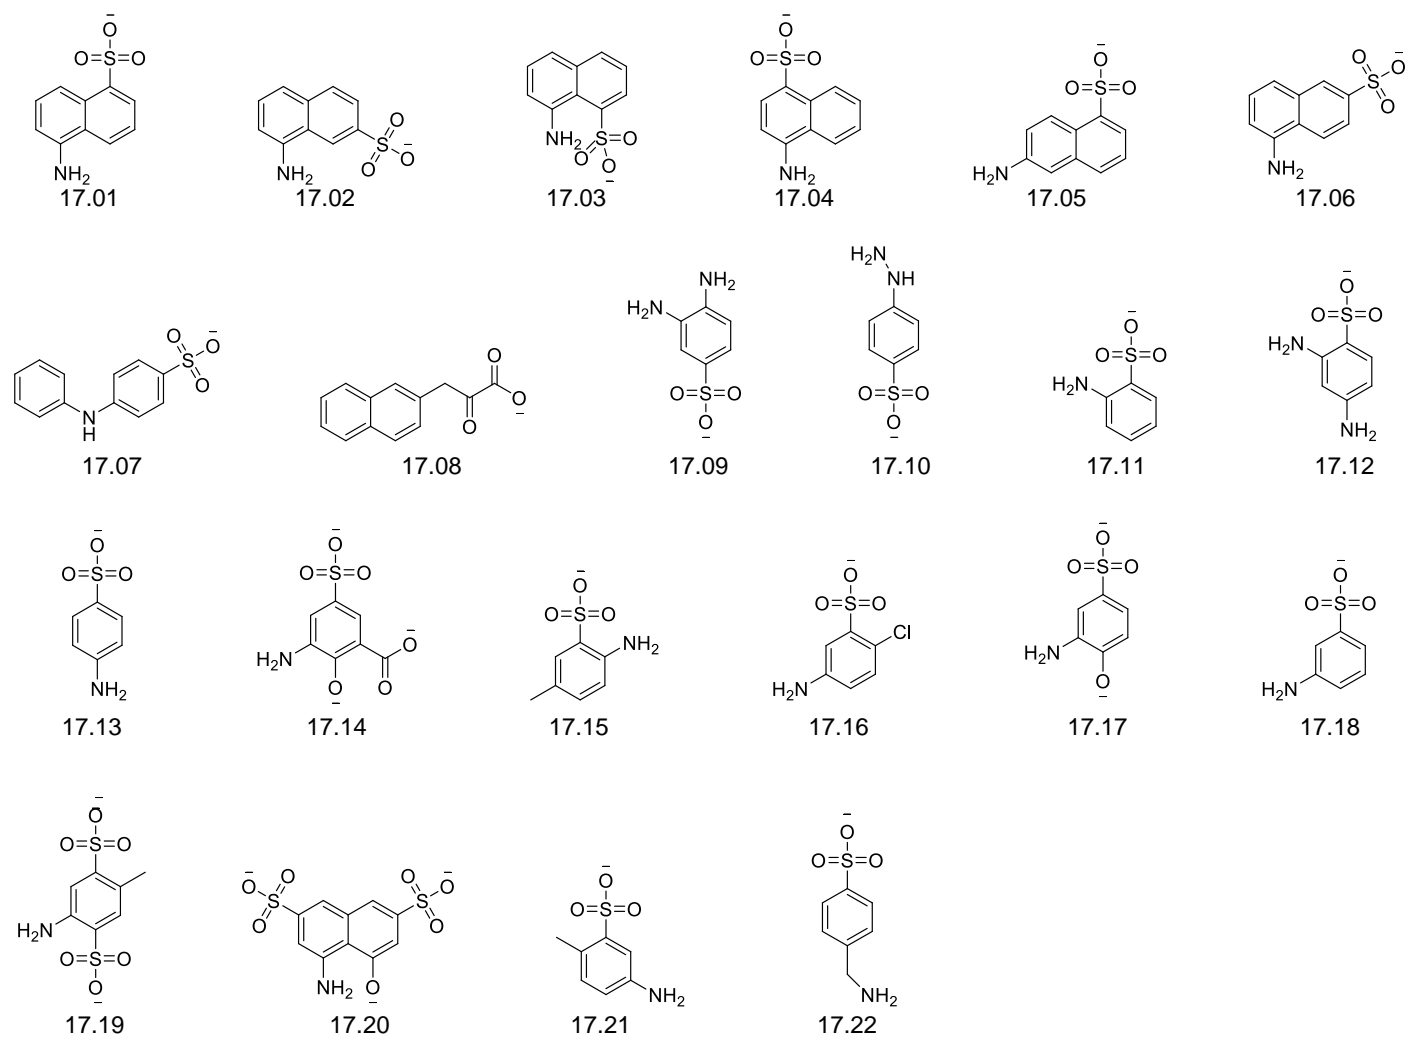**d** C10 analogs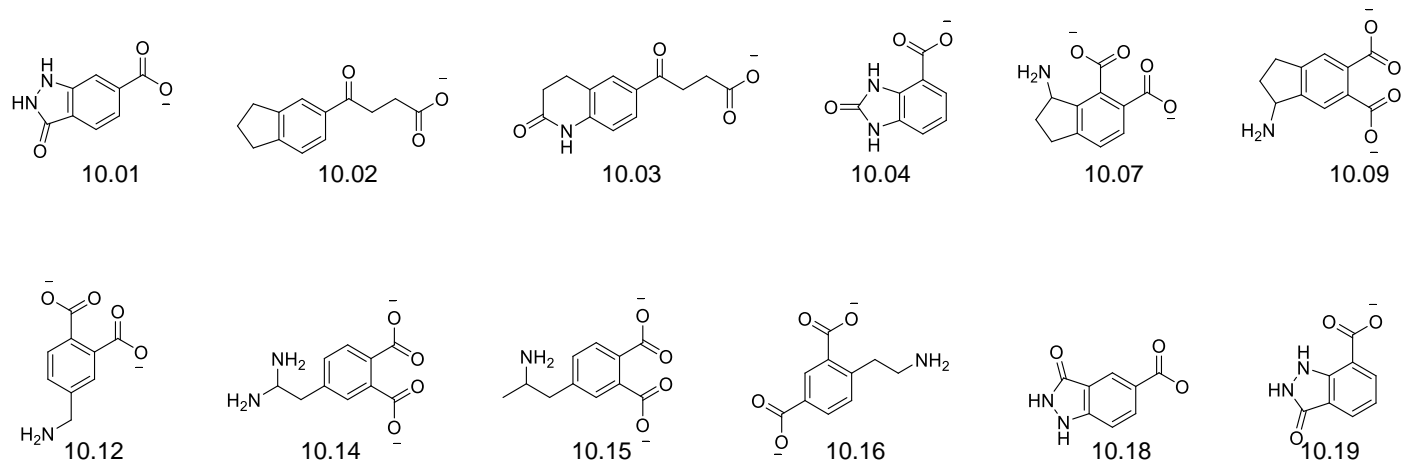

**e** TPP carrier and prodrugs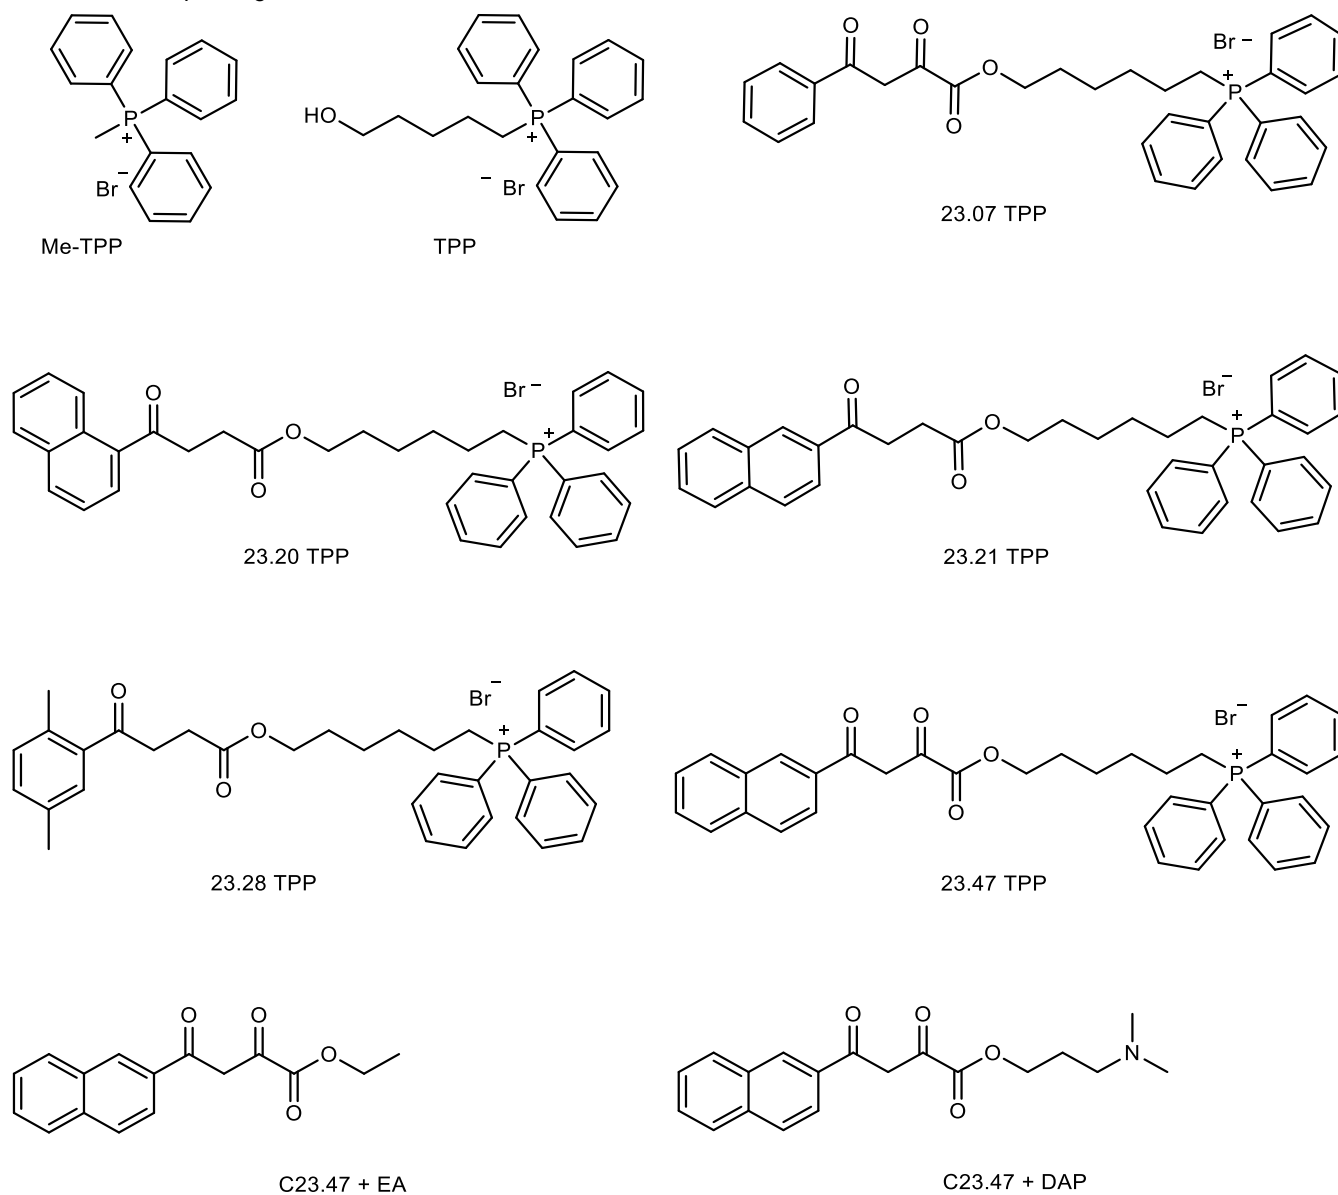

**Supplementary Figure 2: Chemical structures of analogs, carriers and prodrugs.** **a**, Chemical structures of C1-24, the top 24 candidate IspH inhibitors from molecular docking (Extended Data Fig. 3a). Chemical structures of analogs of **b**, C23, **c**, C17 and **d**, C10 tested for their inhibitory activity on Ec-IspH (Fig. 2d, and Extended Data Fig 3c-e). **e**, Structures of prodrugs and TPP carrier molecules (Fig 2e and Extended Data Fig. 4c & 5d)

a

(6-Hydroxyhexyl)triphenylphosphonium bromide synthesis, NMR &amp; Mass:

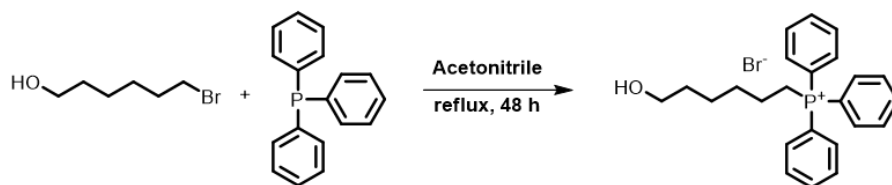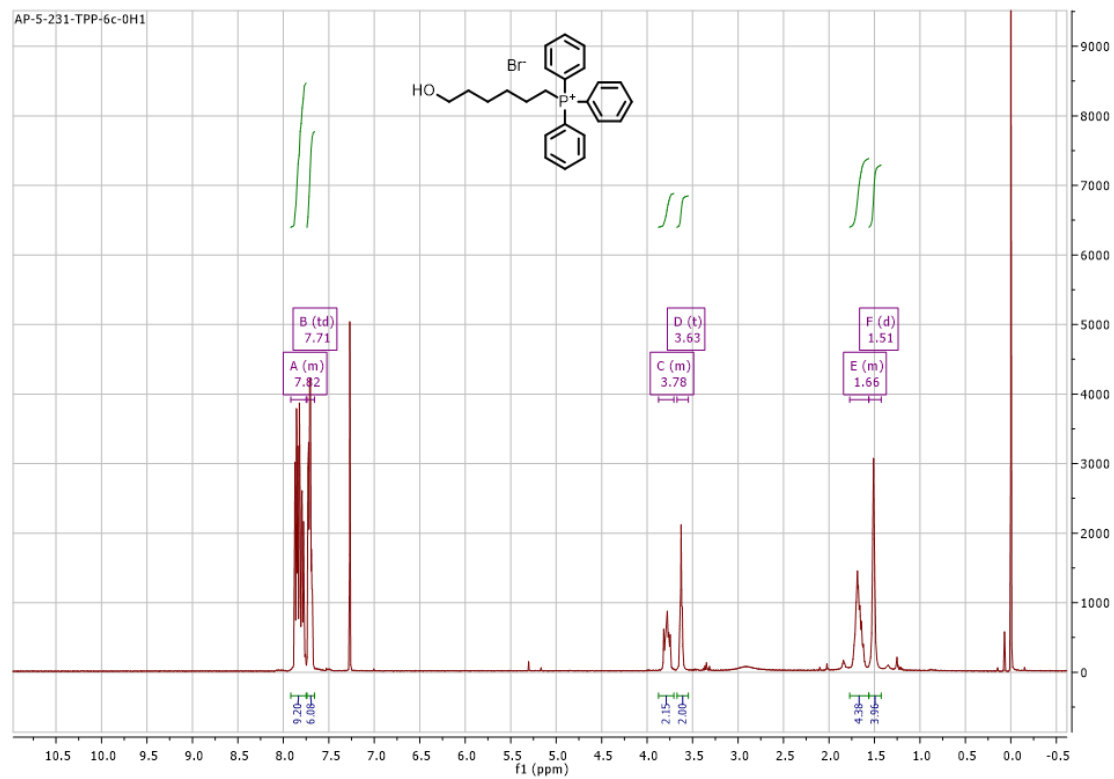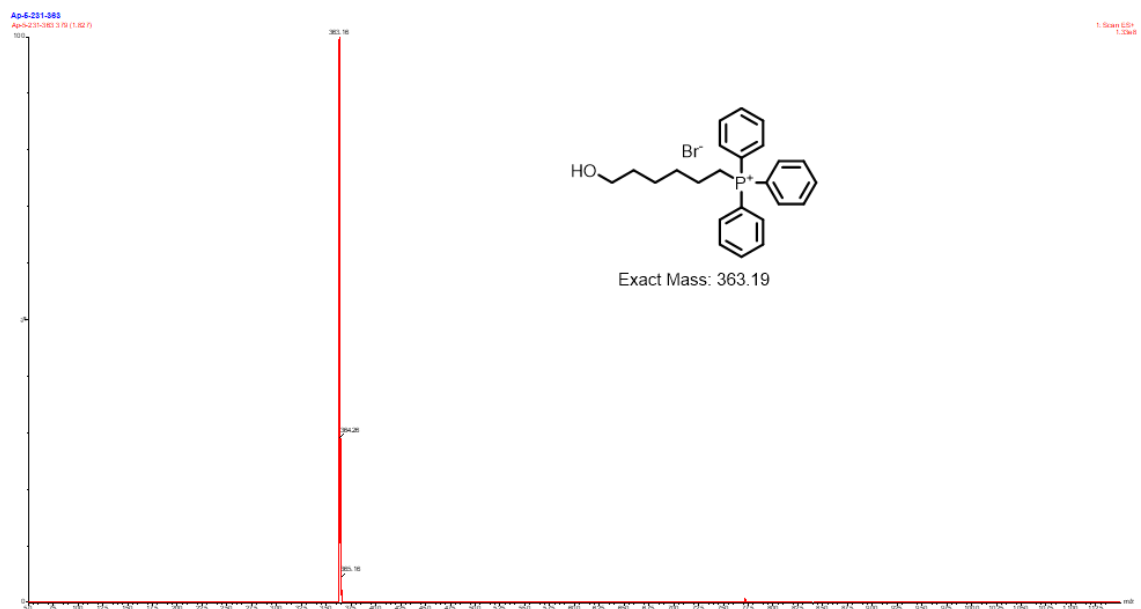

b (6-(4-(Naphthalen-2-yl)-4-oxobutanoyloxy)hexyl)triphenylphosphonium bromide synthesis, NMR & Mass:

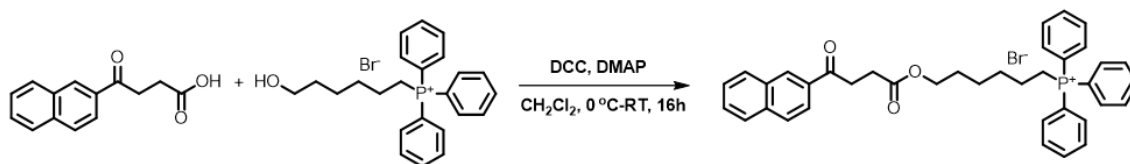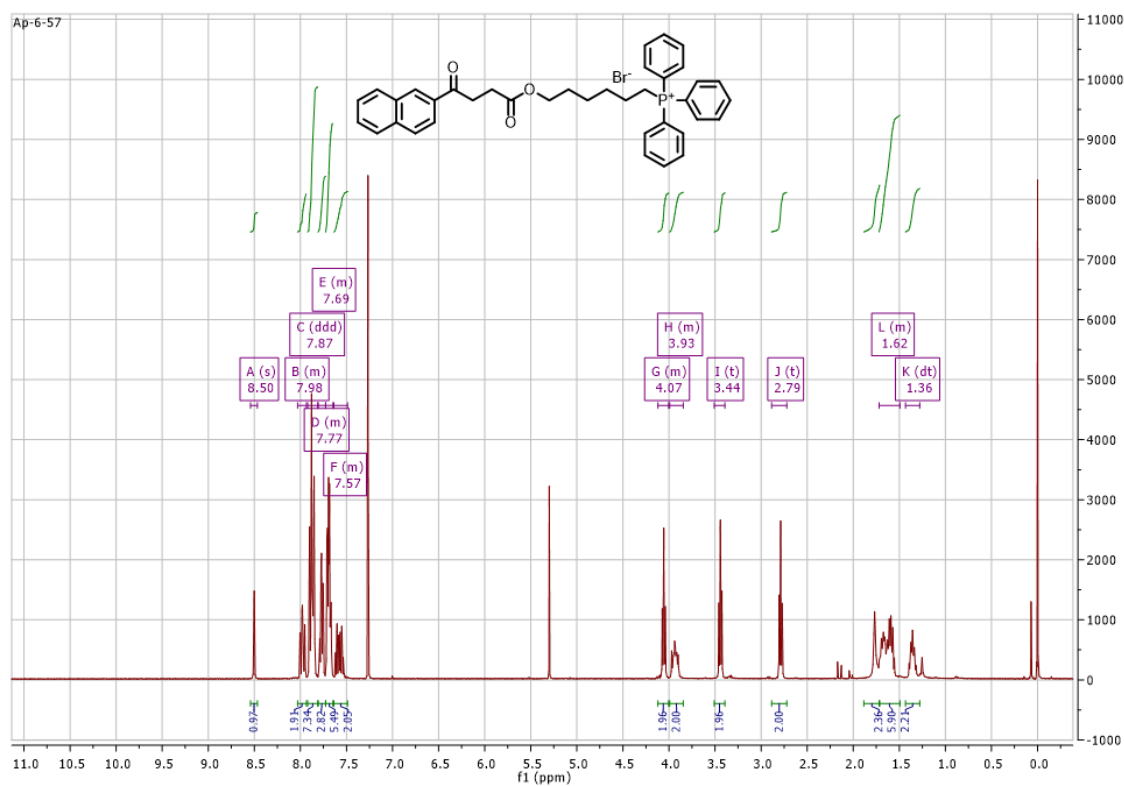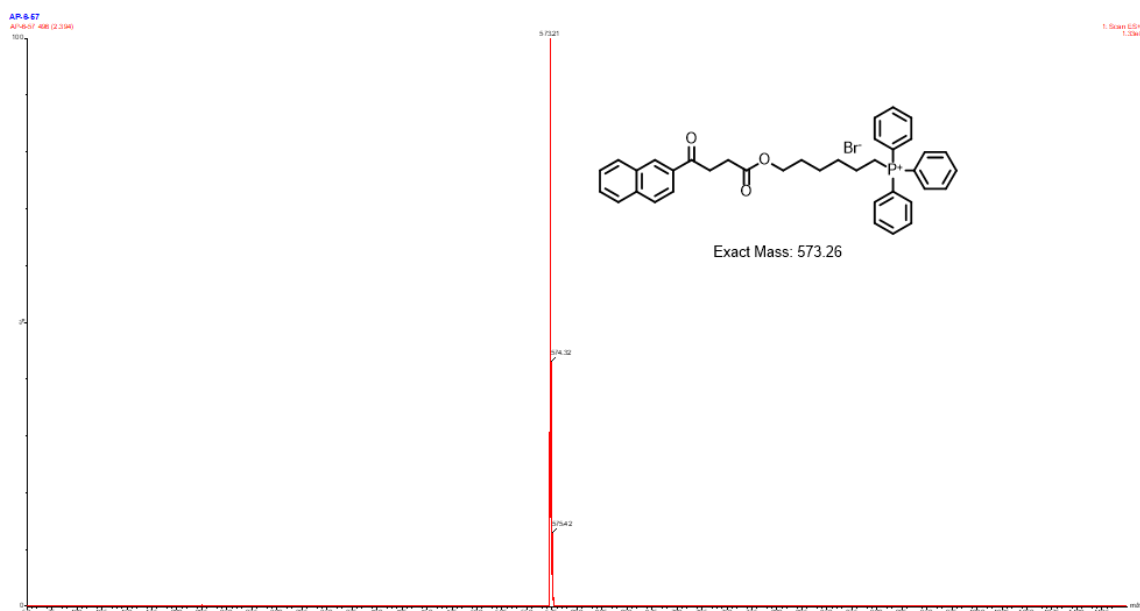

## c (6-(4-(Naphthalen-1-yl)-4-oxobutanoyloxy)hexyl)triphenylphosphonium bromide synthesis, NMR &amp; Mass:

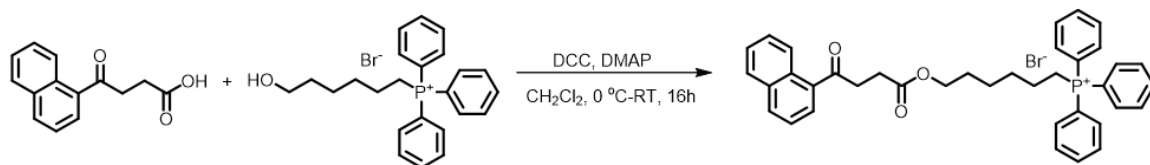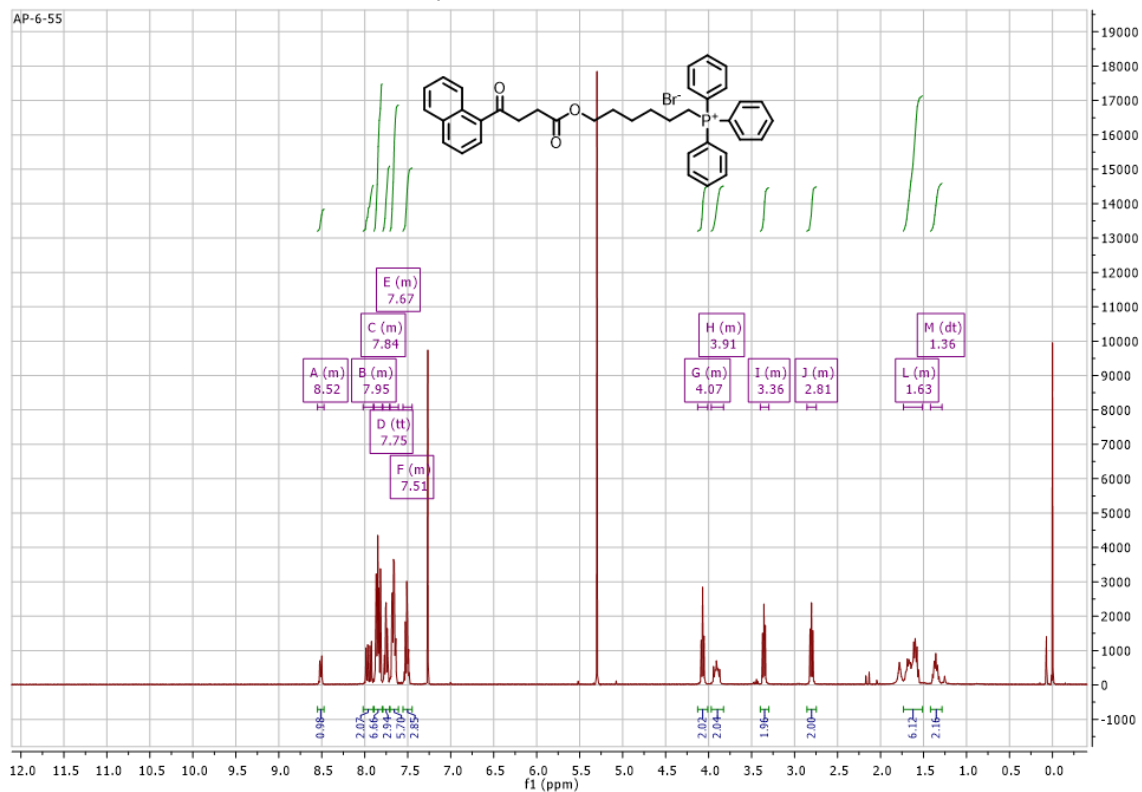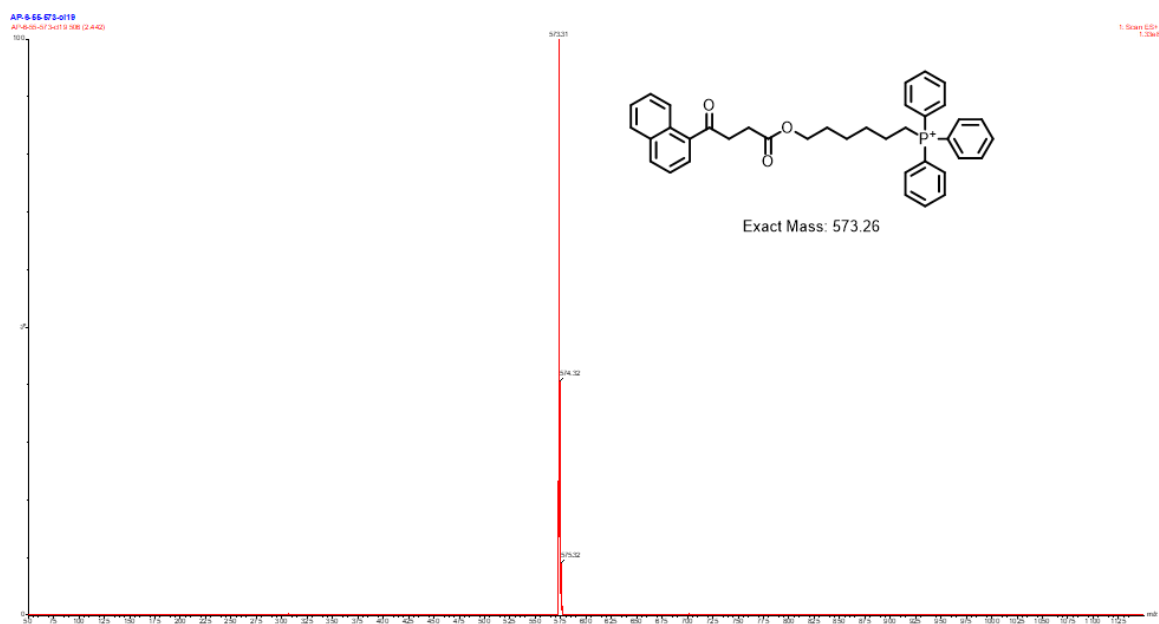

d (6-(4-(2,5-Dimethylphenyl)-4-oxobutanoyloxy)hexyl)triphenylphosphonium bromide synthesis, NMR & Mass:

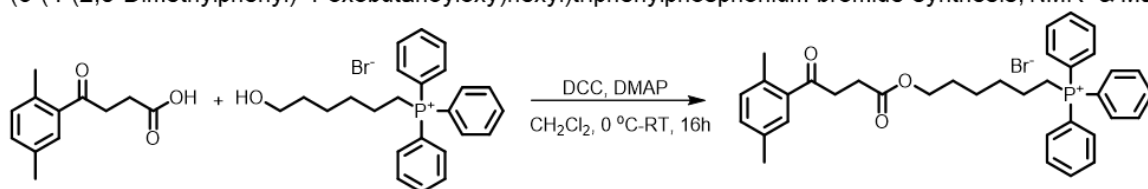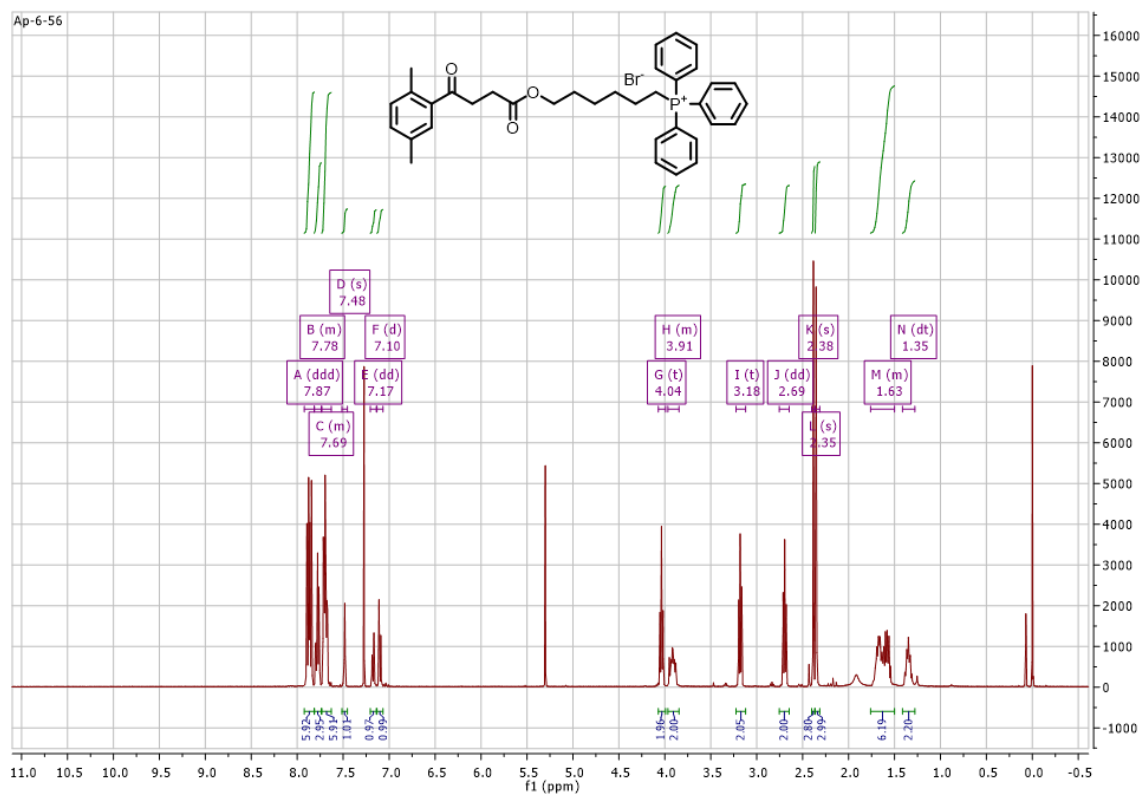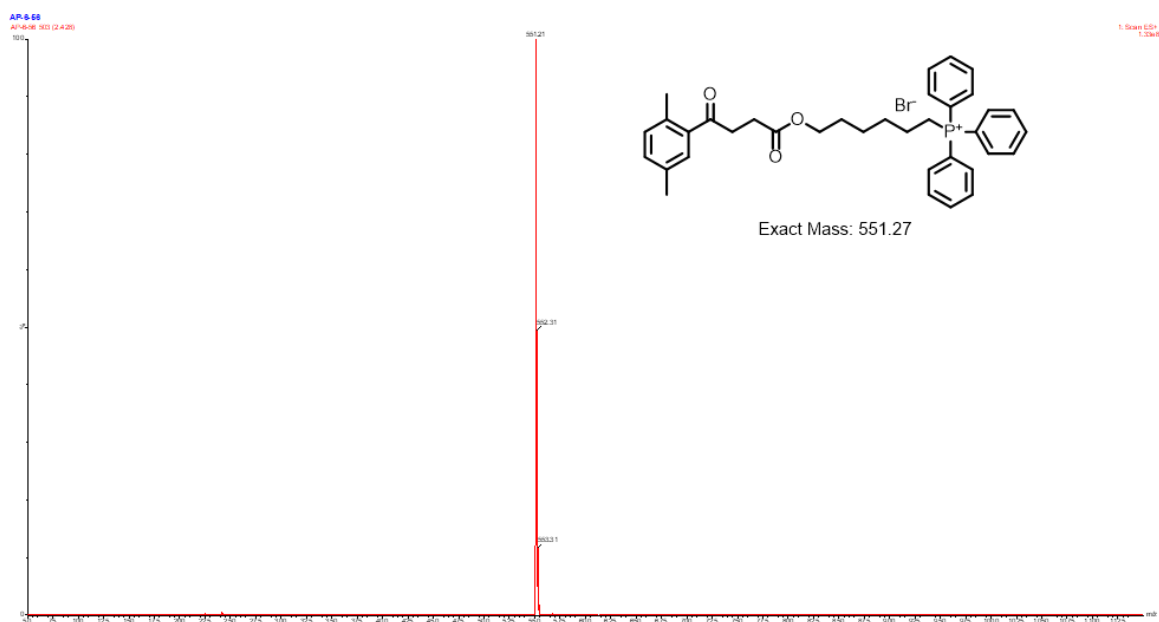

e

(6-(2,4-Dioxo-4-phenylbutanoyloxy)hexyl)triphenylphosphonium bromide synthesis, NMR &amp; Mass:

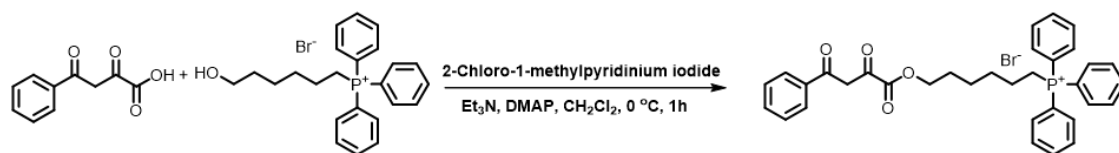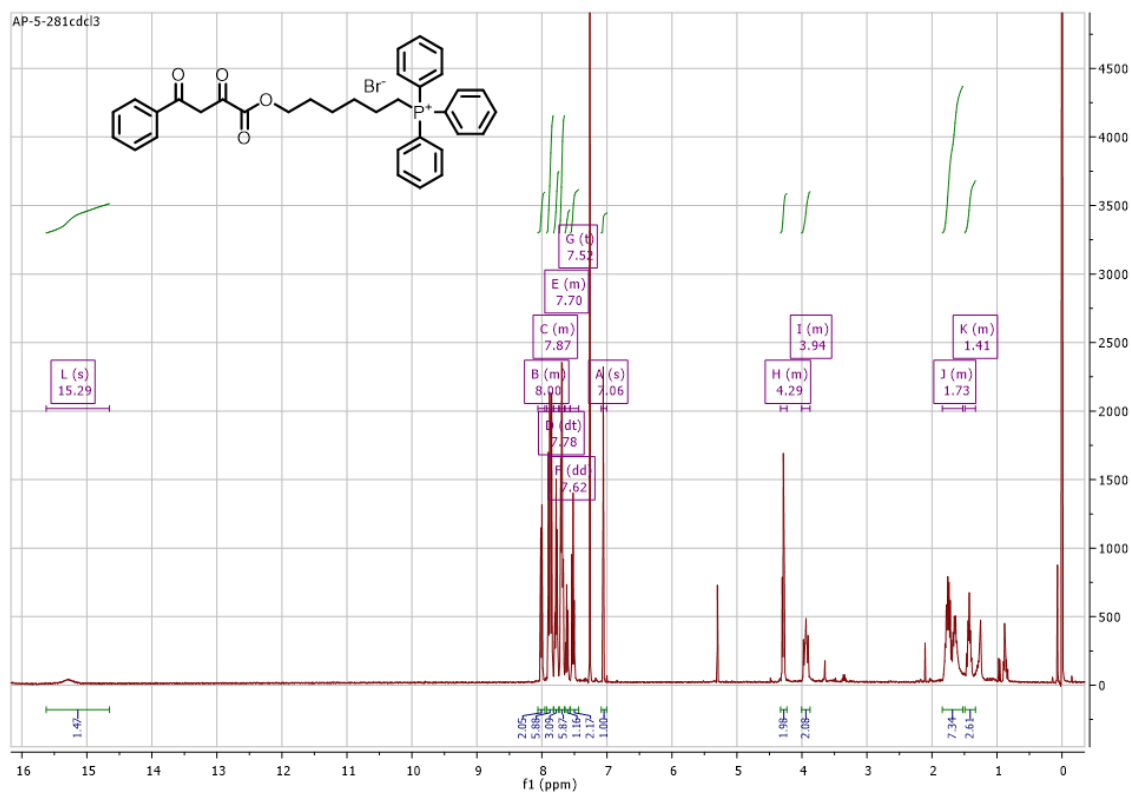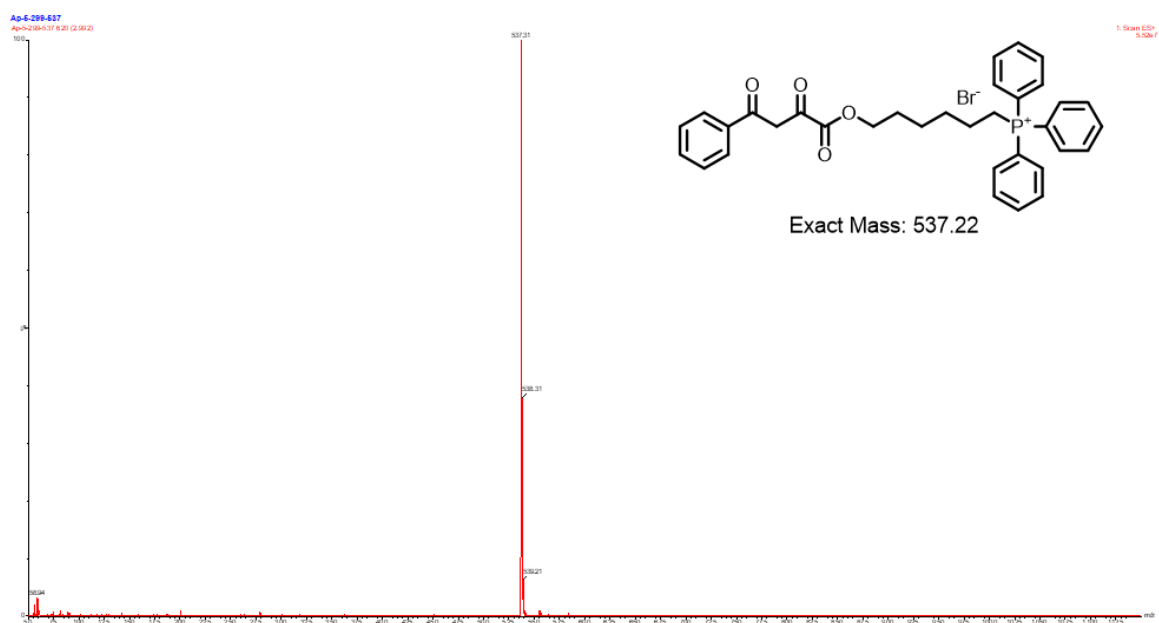

f

(6-(4-(Naphthalen-2-yl)-2,4-dioxobutanoyloxy)hexyl)triphenylphosphonium bromide synthesis, NMR &amp; Mass:

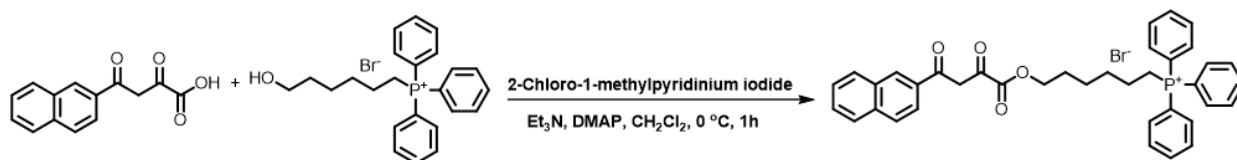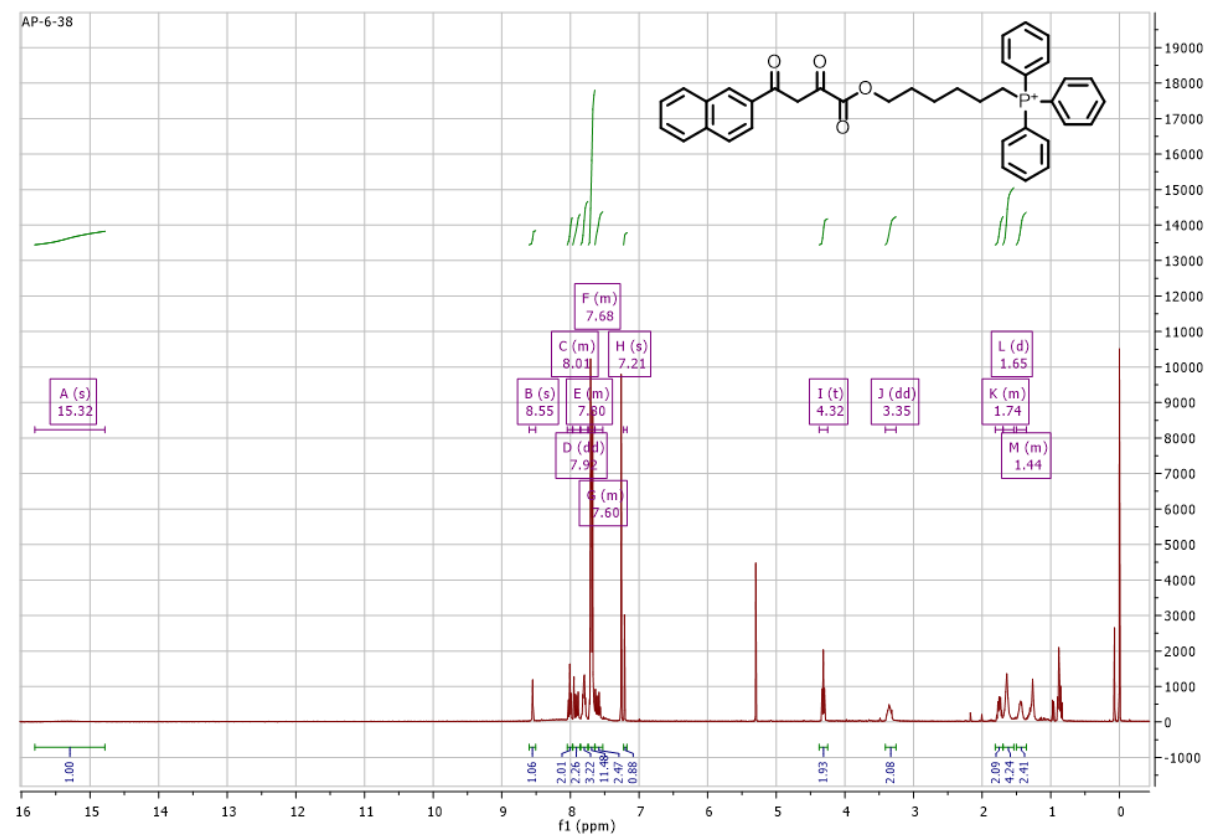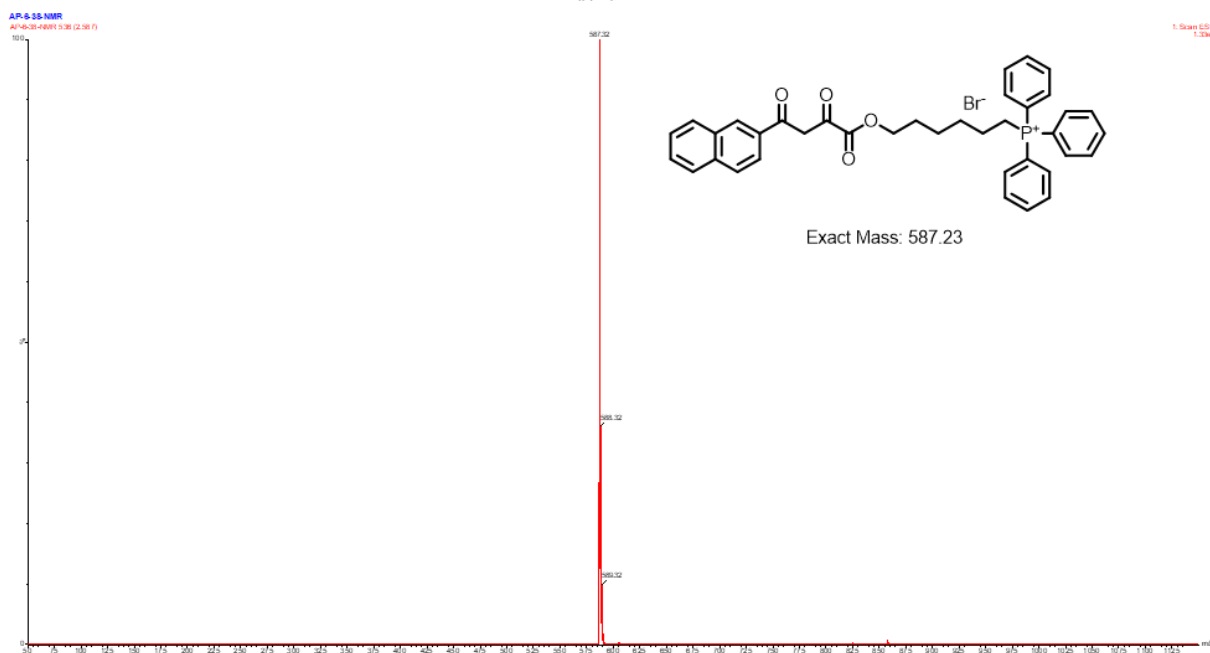

## 9 4-(Naphthalen-2-yl)-2,4-dioxobutanoic acid synthesis, NMR &amp; Mass:

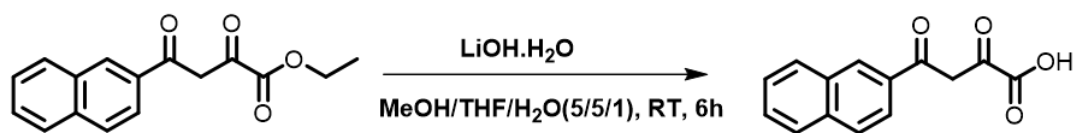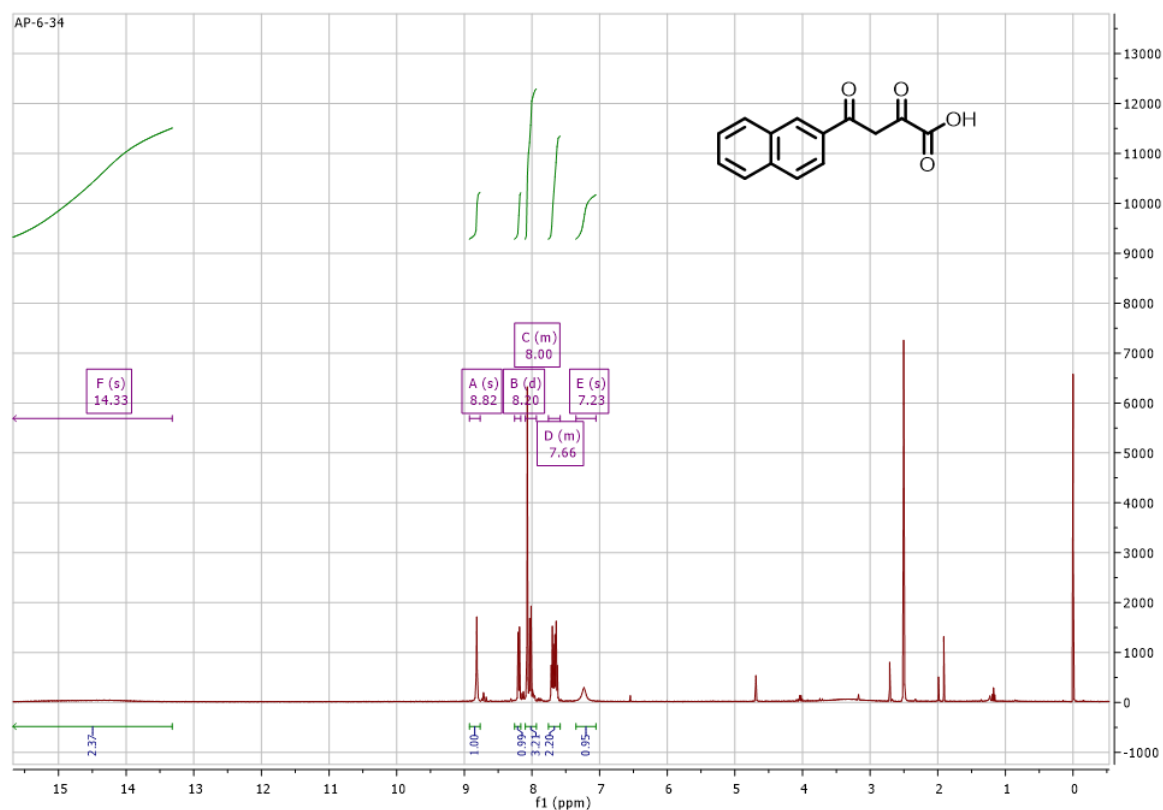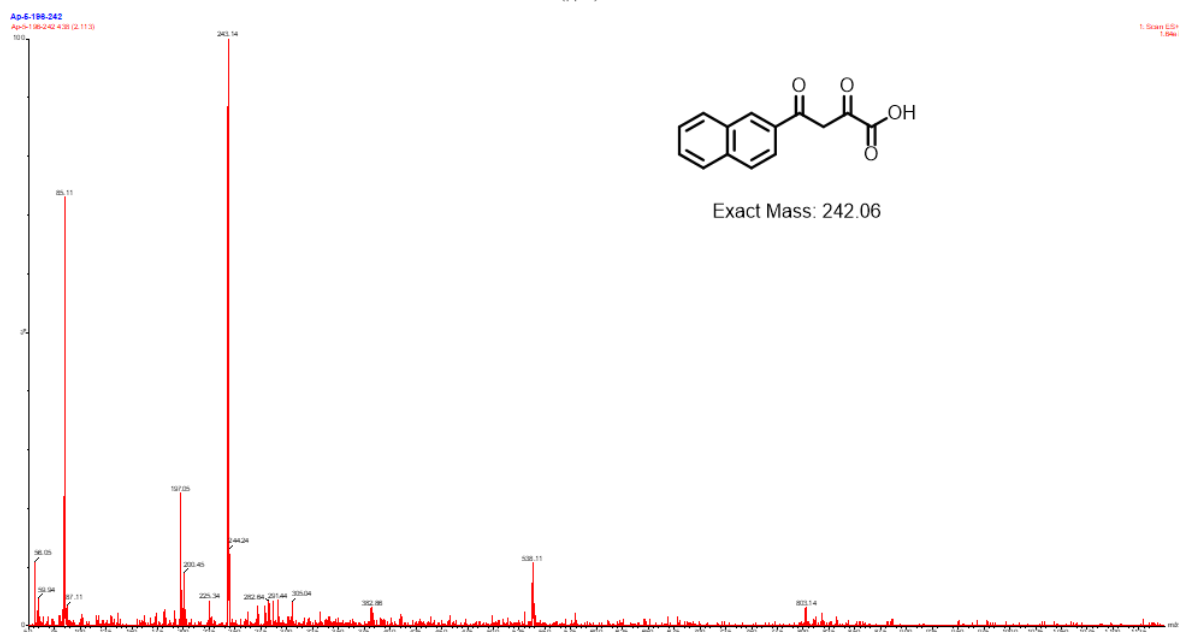

h 3-(Dimethylamino)propyl 4-(naphthalen-2-yl)-2,4-dioxobutanoate synthesis, NMR & Mass:

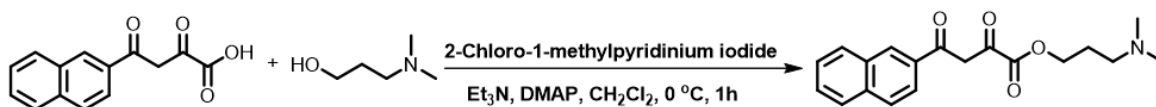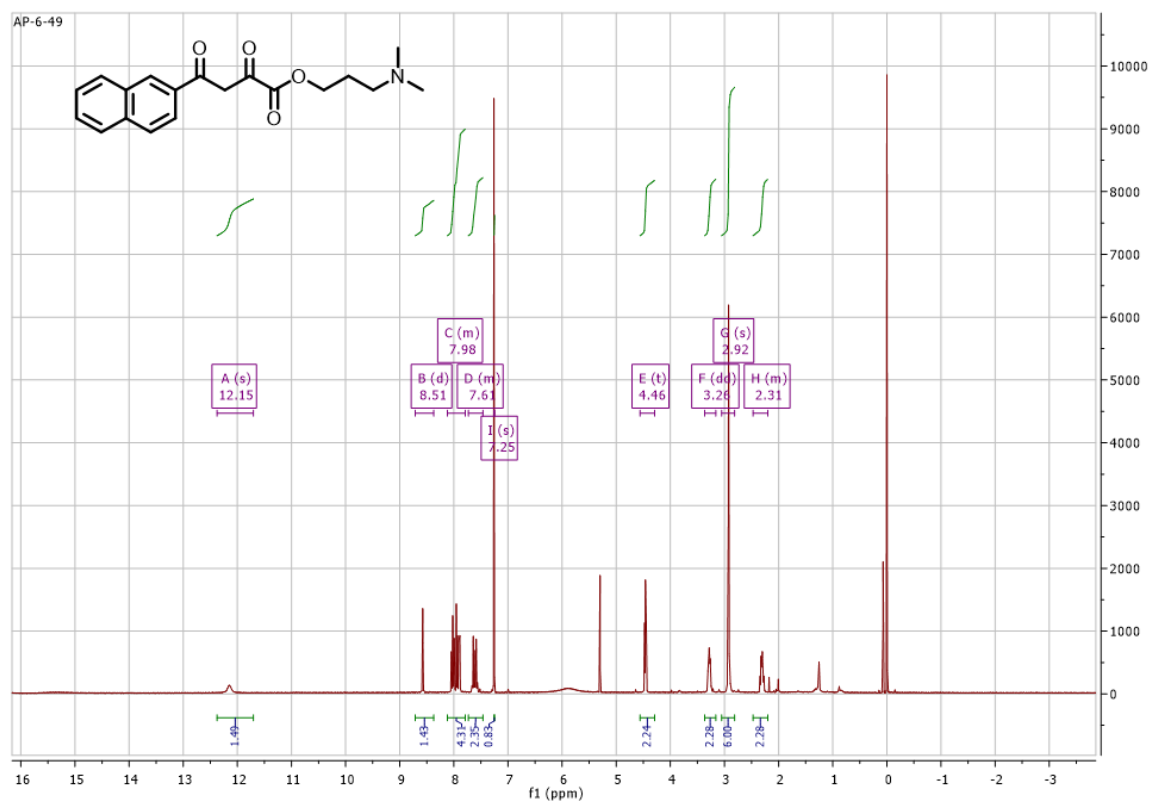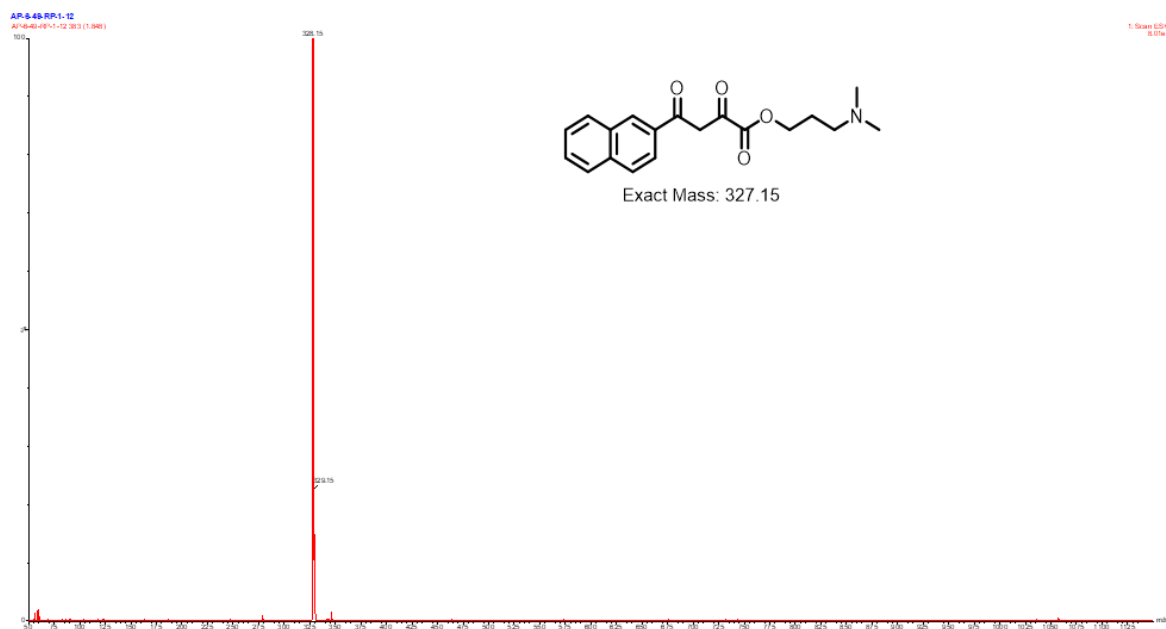

i Ethyl 4-(naphthalen-2-yl)-4-oxobutanoate synthesis, NMR & Mass:

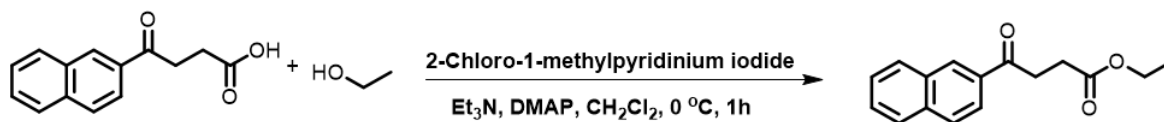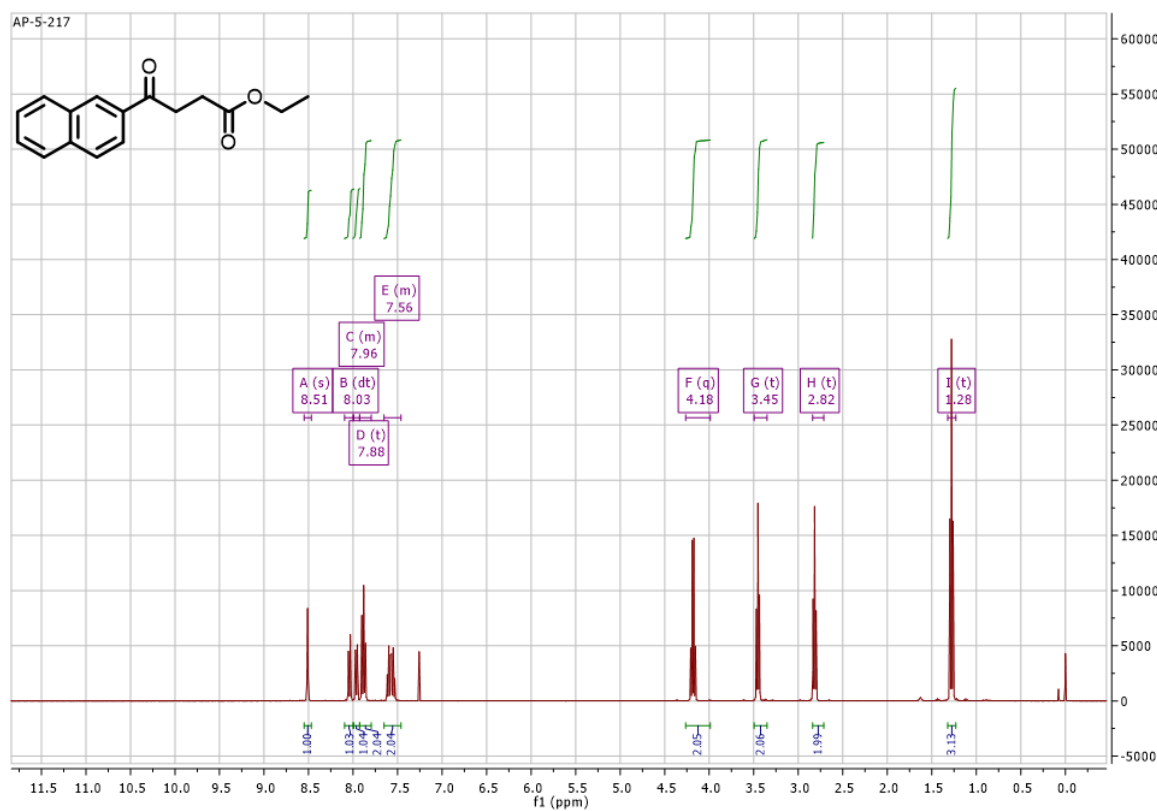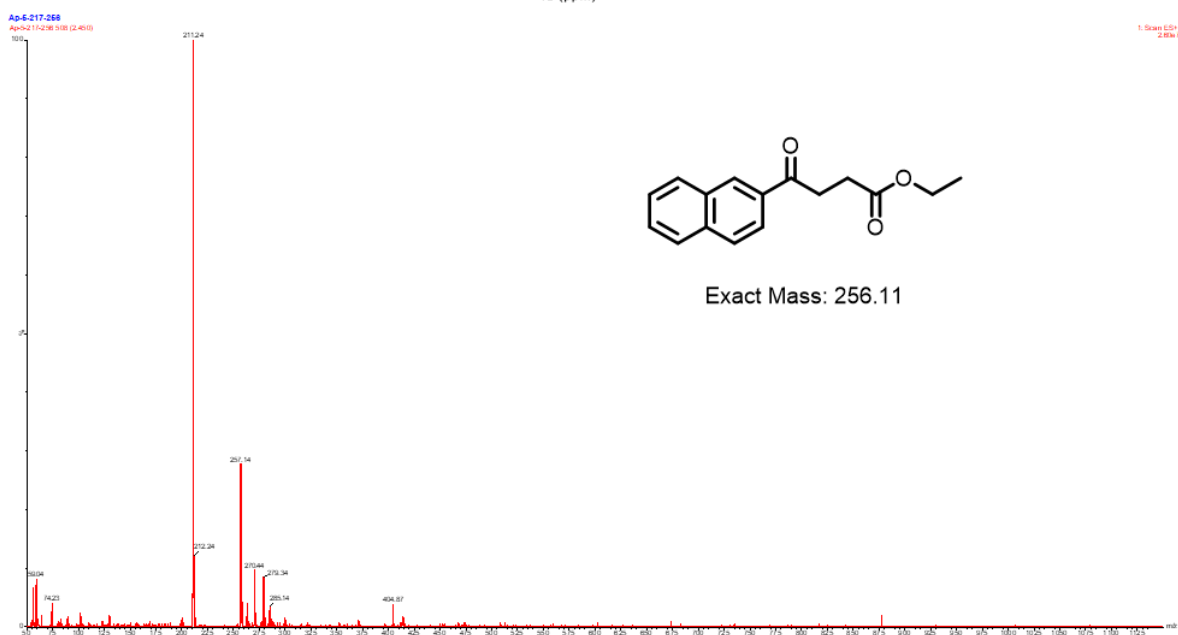

j

Ethyl 4-(naphthalen-1-yl)-4-oxobutanoate synthesis, NMR &amp; Mass:

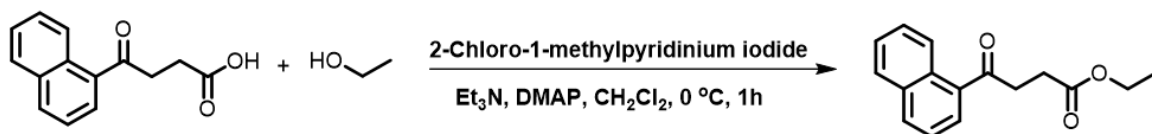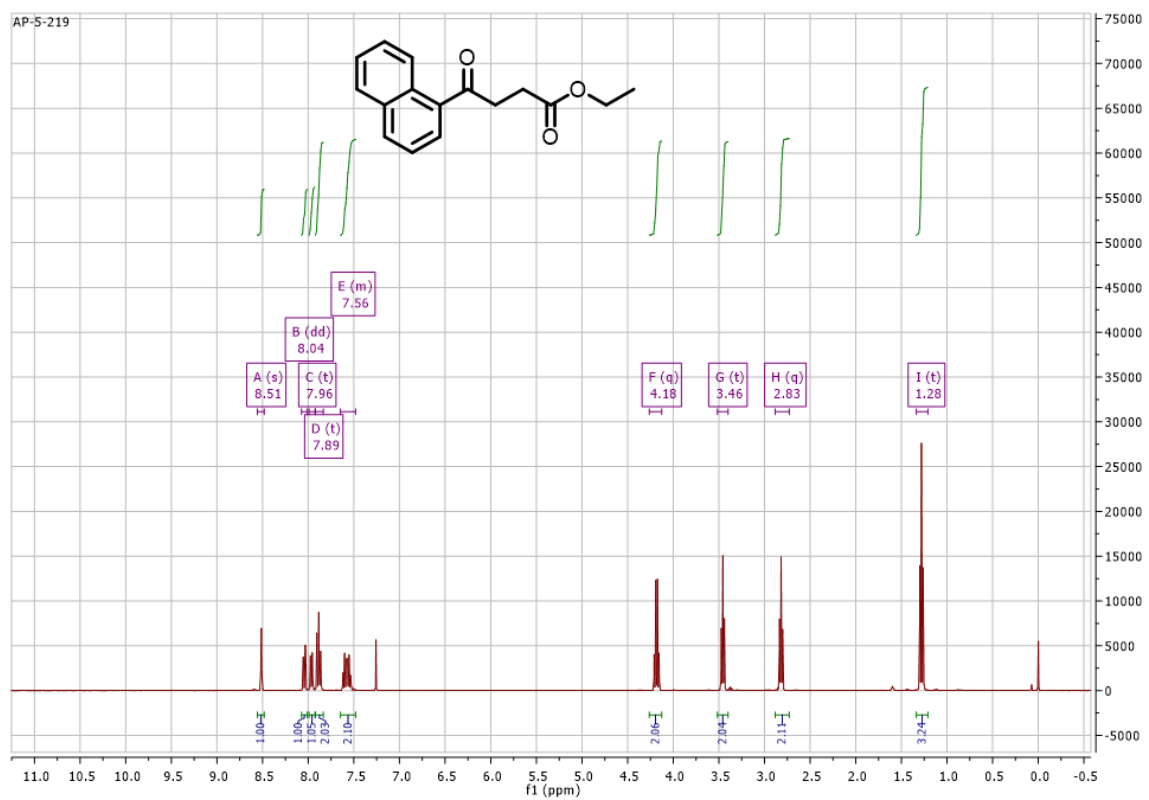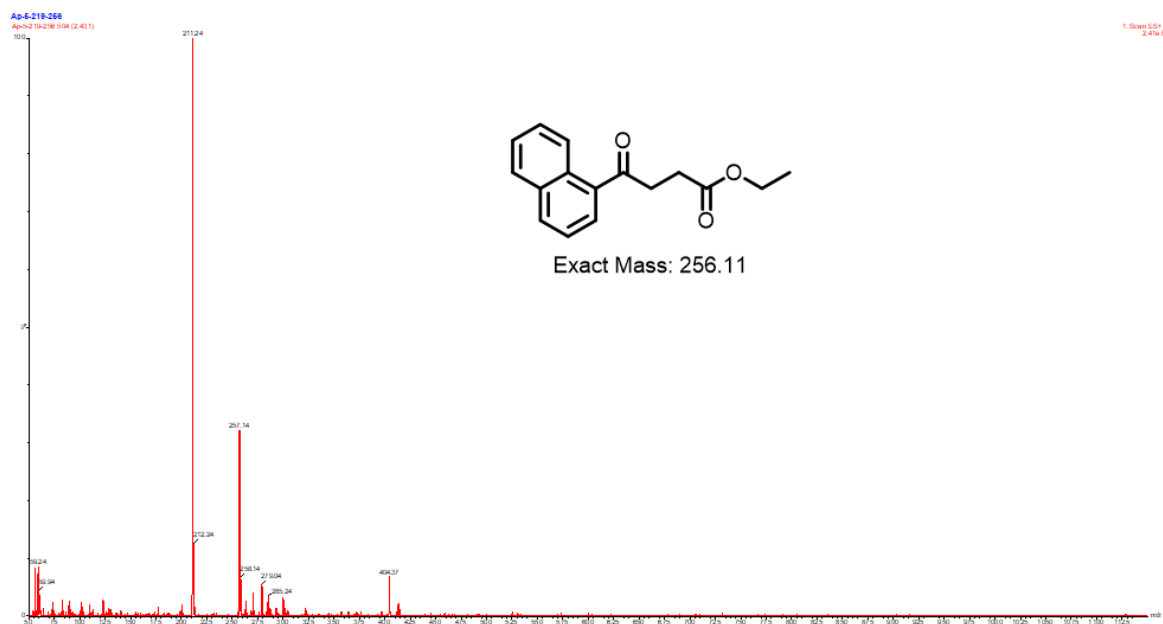

k

Ethyl 4-(2,5-dimethylphenyl)-4-oxobutanoate synthesis, NMR &amp; Mass:

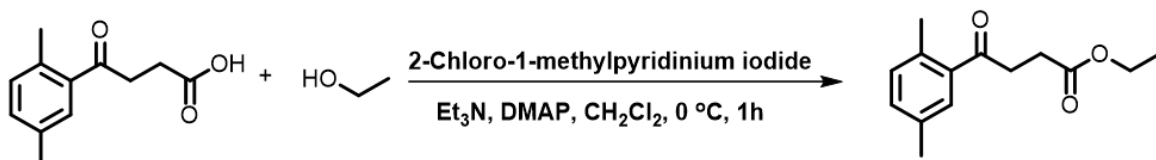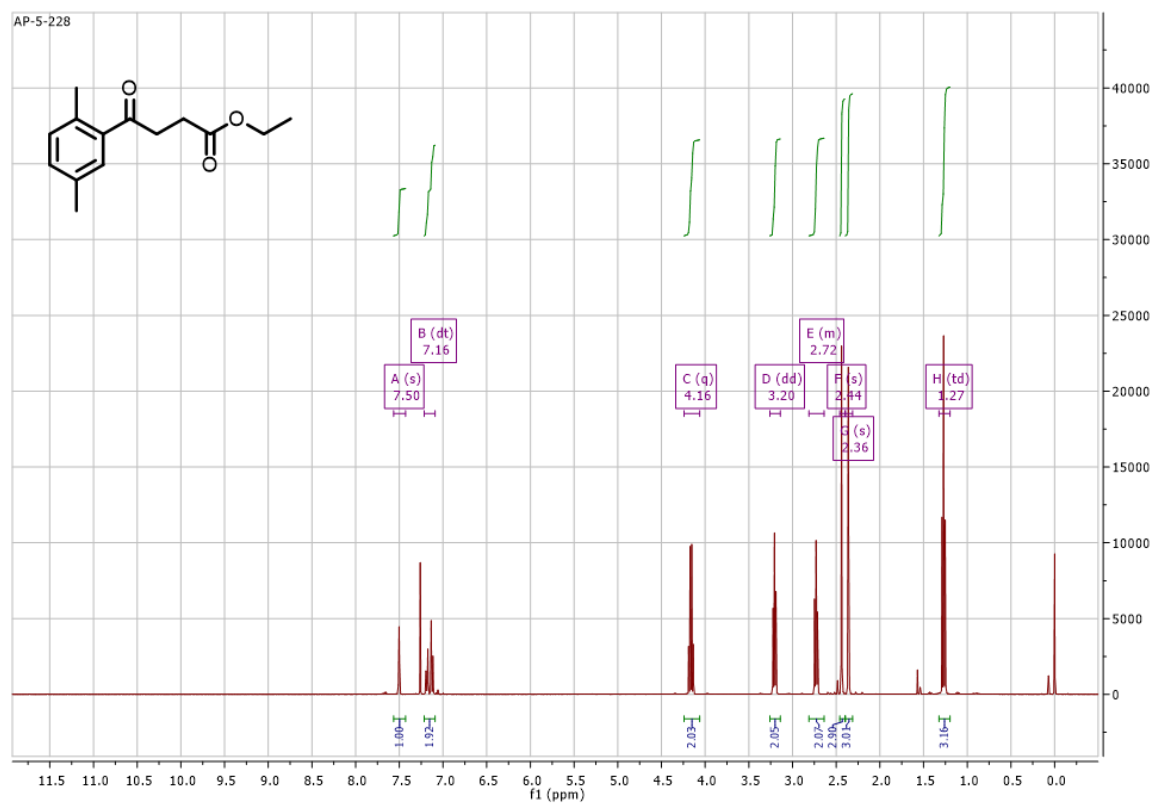Ap-6-228-234  
Ap-6-228-234 315 (2.484)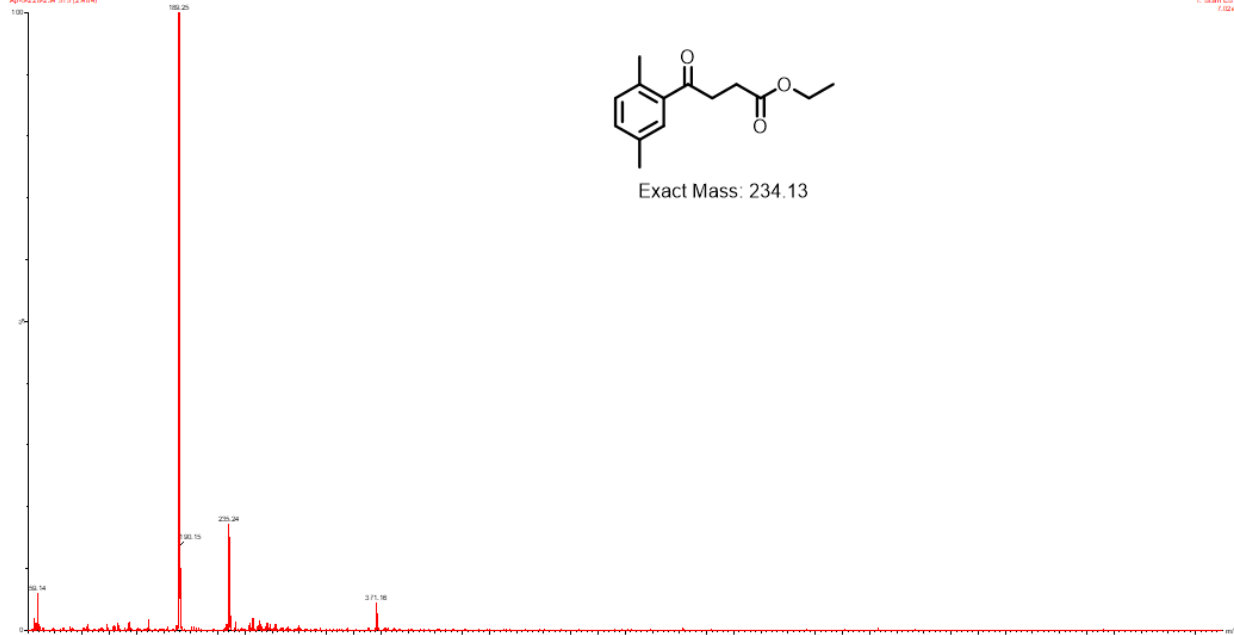

Ethyl 2,4-dioxo-4-phenylbutanoate synthesis, NMR & Mass:

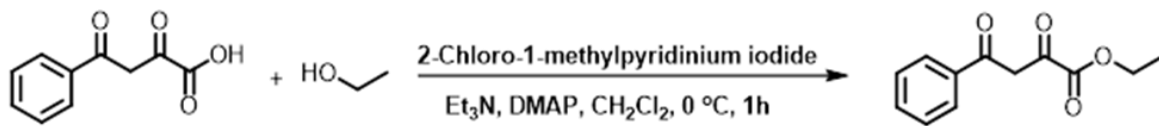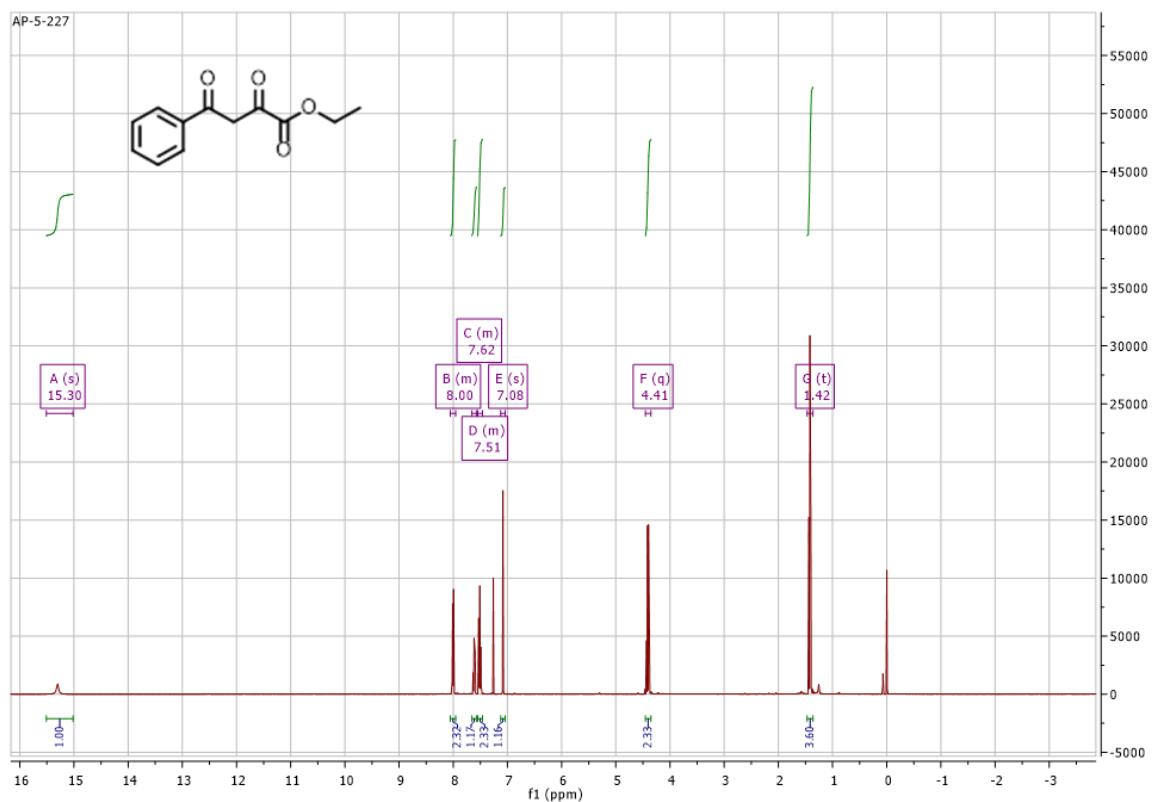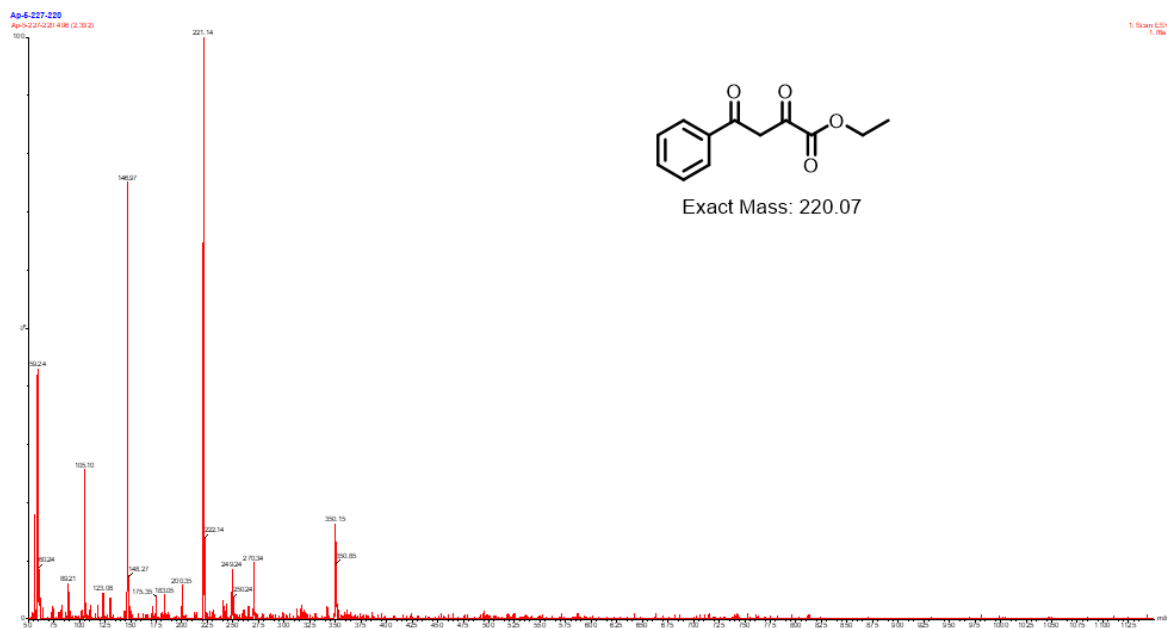

**Supplementary Figure 3: Chemical synthesis and validation of prodrugs by NMR and MS.**

Chemical synthesis and NMR / MS validation of **a**, (6-Hydroxyhexyl)triphenylphosphonium bromide (TPP carrier molecule). This TPP carrier molecule was used to synthesize ester prodrugs **b**, (6-(4-(Naphthalen-2-yl)-4-oxobutanoyloxy)hexyl)triphenylphosphonium bromide (C23.20-TPP) **c**, (6-(4-(Naphthalen-1-yl)-4-oxobutanoyloxy)hexyl)triphenylphosphonium bromide (C23.21-TPP) **d**, (6-(4-(2,5-Dimethylphenyl)-4-oxobutanoyloxy)hexyl)triphenylphosphonium bromide (C23.28-TPP) **e**, (6-(2,4-Dioxo-4-phenylbutanoyloxy)hexyl)triphenylphosphonium bromide (C23.07-TPP) **f**, (6-(4-(Naphthalen-2-yl)-2,4-dioxobutanoyloxy)hexyl)triphenylphosphonium bromide (C23.47-TPP). **g**, Synthesis of 4-(Naphthalen-2-yl)-2,4-dioxobutanoic acid (C23.47). **h**, 3-(Dimethylamino)propyl 4-(naphthalen-2-yl)-2,4-dioxobutanoate (C23.47-DAP). **i**, Ethyl 4-(naphthalen-2-yl)-4-oxobutanoate (C23.20-EA). **j**, Ethyl 4-(naphthalen-1-yl)-4-oxobutanoate synthesis (C23.21-EA). **k**, Ethyl 4-(2,5-dimethylphenyl)-4-oxobutanoate (C23.28-EA). **l**, Ethyl 2,4-dioxo-4-phenylbutanoate (C23.07-EA).
