# Supplementary material
Source: PubMed Central journal article supplement (PMC8776033)
Supplement: NIHMS1646145-supplement-3.pdf [file NIHMS1646145-supplement-3.pdf]

| Drug | IC <sub>50</sub> (μM) | Drug | IC <sub>50</sub> (μM) | Drug | IC <sub>50</sub> (μM) |
|------|-----------------------|------|-----------------------|------|-----------------------|
| C1   | 31                    | C9   | 44                    | C17  | 0.004                 |
| C2   | 127                   | C10  | 9                     | C18  | 17                    |
| C3   | 13                    | C11  | 10                    | C19  | 23                    |
| C4   | 2.17E+06              | C12  | 20                    | C20  | 92                    |
| C5   | 25                    | C13  | 33                    | C21  | 9                     |
| C6   | 14                    | C14  | 45                    | C22  | 13                    |
| C7   | 4727                  | C15  | 13                    | C23  | 0.0858                |
| C8   | 2.96E+22              | C16  | 93                    | C24  | 12                    |

**Supplementary Table 1:** The half maximal inhibitory concentrations (IC<sub>50</sub>) of C1-24 calculated from respective curves in Fig. 2a.

| Drug | IC <sub>50</sub> (μM) |         |         |
|------|-----------------------|---------|---------|
|      | MTB IspH              | PA IspH | PF IspH |
| C17  | 0.3567                | 0.0051  | 0.0310  |
| C23  | 0.1697                | 0.0023  | 0.5043  |

**Supplementary Table 2:** IC<sub>50</sub> of C17 and C23 against *Mycobacterial* (MTB), *Pseudomonas* (Pa) and *Plasmodium* (Pf) IspH calculated from respective curves in Fig. 2c.

| Drug   | IC <sub>50</sub> (μM) |
|--------|-----------------------|
| C23.07 | 0.0283                |
| C23.20 | 0.0022                |
| C23.21 | 0.0030                |
| C23.28 | 0.0201                |
| C23.47 | 0.0814                |

**Supplementary Table 3:** IC<sub>50</sub> of C23 analogs against *E. coli* IspH calculated from respective curves in Fig. 2d.

| MDR Bacteria           | MIC <sub>90</sub> |           |                 |              |            |              |           |       |           |       |
|------------------------|-------------------|-----------|-----------------|--------------|------------|--------------|-----------|-------|-----------|-------|
|                        | 23.07 TPP         |           | 23.20 TPP       |              | 23.21 TPP  |              | 23.28 TPP |       | 23.47 TPP |       |
|                        | μM                | μg/ml     | μM              | μg/ml        | μM         | μg/ml        | μM        | μg/ml | μM        | μg/ml |
| <i>A. baumannii</i>    | >500              | >250      | 31              | 16           | 31         | 16           | 16        | 8     | 250       | 125   |
| <i>K. pneumoniae</i>   | >500              | >250      | 16              | 8            | 31         | 16           | 31        | 16    | 250       | 125   |
| <i>E. aerogenes</i>    | 125               | 63        | 31              | 16           | 16         | 8            | 31        | 16    | 63        | 31    |
| <i>V. cholerae</i>     | 125               | 63        | 16              | 8            | 16         | 8            | 16        | 8     | 63        | 31    |
| <i>S. flexneri</i>     | >500              | >250      | 63              | 31           | 31         | 16           | 63        | 31    | 125       | 63    |
| <i>E. coli</i>         | 63                | 31        | 4               | 2            | 4          | 2            | 4         | 2     | <4        | <2    |
| <i>H. pylori</i>       | 250               | 125       | 31              | 16           | 31         | 16           | 31        | 16    | 63        | 31    |
| <i>M. tuberculosis</i> | 4                 | 2         | 4               | 2            | 4          | 2            | 4         | 2     | 63        | 31    |
| <i>P. aeruginosa</i>   | >500              | >250      | 31              | 16           | 63         | 31           | 125       | 63    | 250       | 125   |
| <i>Y. pestis</i>       | >500              | >250      | 31              | 16           | 63         | 31           | 63        | 31    | 125       | 63    |
| <i>B. sphaericus</i>   | >500              | >250      | 31              | 16           | 63         | 31           | 63        | 31    | 500       | 250   |
| MDR Bacteria           | Antibiotics       |           |                 |              |            |              |           |       |           |       |
|                        | Ampicillin        | Kanamycin | Chloramphenicol | Tetracycline | Gentamycin | Streptomycin |           |       |           |       |
| <i>A. baumannii</i>    | R                 | R         | R               | R            | S          | R            |           |       |           |       |
| <i>K. pneumoniae</i>   | R                 | R         | R               | R            | R          | S            |           |       |           |       |
| <i>E. aerogenes</i>    | R                 | R         | S               | R            | R          | R            |           |       |           |       |
| <i>V. cholerae</i>     | R                 | S         | S               | R            | S          | R            |           |       |           |       |
| <i>S. flexneri</i>     | R                 | S         | S               | S            | S          | S            |           |       |           |       |
| <i>E. coli</i>         | S                 | S         | S               | S            | S          | S            |           |       |           |       |
| <i>H. pylori</i>       | R                 | R         | S               | R            | R          | S            |           |       |           |       |
| <i>M. tuberculosis</i> | R                 | S         | S               | S            | S          | S            |           |       |           |       |
| <i>P. aeruginosa</i>   | R                 | R         | R               | R            | R          | R            |           |       |           |       |
| <i>Y. pestis</i>       | R                 |           |                 |              |            |              |           |       |           |       |
| <i>B. sphaericus</i>   | R                 |           |                 |              |            |              |           |       |           |       |

R = Resistant (>250μM), S = Sensitive

#### Supplementary Table 4: Testing DAIA prodrugs on MDR clinical isolates of multiple bacteria and comparing against commercial antibiotics.

Bacteria permeable TPP linked prodrug forms of C23.07, C23.20, C23.21, C23.28 and C23.47 were tested for killing efficiency against multidrug resistant (MDR) clinical isolates of multiple species of pathogenic bacteria measured by resazurin blue and CFU assay. Top panel shows the respective Minimum Inhibitory Concentration required to inhibit the growth of 90% of organisms (MIC<sub>90</sub>). Any organism with an MIC<sub>90</sub> > 250μg/mL (500μM) is considered resistant to the antibiotic. Bottom panel shows resistance of the clinical isolates tested to commercial antibiotics.

| Clinical isolates of P/MDR Bacteria | MIC90 ( $\mu\text{M}$ ) |           |           |             |           |          |             |          |               |            |
|-------------------------------------|-------------------------|-----------|-----------|-------------|-----------|----------|-------------|----------|---------------|------------|
|                                     | 23.20 TPP               | 23.21 TPP | 23.28 TPP | Ceftaroline | Meropenem | Amikacin | Ceftriaxone | Cefepime | Ciprofloxacin | Tobramycin |
| <i>A. baumannii</i> (AB5075-UW)     | 31                      | 31        | 16        | 500         | 125       | 125      | 250         | 250      | 250           | 125        |
| <i>K. pneumoniae</i> (1.53)         | 31                      | 16        | 31        | >500        | 125       | >500     | >500        | 125      | 125           | >500       |
| <i>E. aerogenes</i> (UC115)         | 31                      | 16        | 63        | 500         | 125       | 250      | >500        | 500      | 125           | 125        |
| <i>V. cholerae</i>                  | 16                      | 16        | 16        | >500        | 250       | >500     | >500        | 125      | 125           | >500       |
| <i>P. aeruginosa</i> (MRSN 5524)    | 16                      | 31        | 250       | 500         | 125       | 31       | 500         | 500      | 63            | 63         |

**Supplementary Table 5: Comparing DAIA prodrugs against best-in class antibiotics on MDR clinical isolates of multiple bacteria.** MIC90 of C23.20, C23.21 and C23.28 prodrugs against *A. baumannii*, *K. pneumoniae*, *E. aerogenes*, *V. cholerae* and *P. aeruginosa* compared to the respective MIC90s of Ceftaroline, Meropenem, Amikacin, Ceftriaxone, Cefepime, Ciprofloxacin and Tobramycin.
